# Supplementary material for: Layered ion dynamics and enhanced energy storage: VS2/MXene heterostructure anodes revolutionizing Li-ion batteries
Source: Royal Society of Chemistry journal article supplement (doi:10.1039/d4nr05451b), 2025-01-01
Supplement: d4nr05451b1.pdf [file d4nr05451b1.pdf]

## Supporting Information

# Layered Ion Dynamics and Enhanced Energy Storage: VS<sub>2</sub>/MXene Heterostructure Anodes Revolutionizing Li-Ion Batteries

*Mahendiraprabu Ganesan<sup>a</sup> and Jin Yong Lee<sup>a\*</sup>*

Department of Chemistry, Sungkyunkwan University, Suwon 16419, Korea

**Fig. S1.** Optimized structures of the (a) VS<sub>2</sub>/Ti<sub>3</sub>C<sub>2</sub>O<sub>2</sub> and (b) VS<sub>2</sub>/V<sub>3</sub>C<sub>2</sub>O<sub>2</sub> heterostructures were obtained through concentration variations with Li-loading.

**Fig. S2.** The charge density (a - d) and charge density difference (e - h) plots for VS<sub>2</sub>/Ti<sub>3</sub>C<sub>2</sub>O<sub>2</sub> heterostructures with Li-loading. The symbols "+" and "-" indicates electron accumulation and depletion regions respectively.

**Fig. S3.** The charge density (a - d) and charge density difference (e - h) plots for VS<sub>2</sub>/V<sub>3</sub>C<sub>2</sub>O<sub>2</sub> heterostructures with Li-loading. The symbols "+" and "-" indicates electron accumulation and depletion regions respectively.

**Fig. S4.** The projected band structures with corresponding total density of states for VS<sub>2</sub>/Ti<sub>3</sub>C<sub>2</sub>O<sub>2</sub> heterostructures with Li-loading.

**Fig. S5.** The projected band structures with corresponding total density of states for VS<sub>2</sub>/V<sub>3</sub>C<sub>2</sub>O<sub>2</sub> heterostructures with Li-loading.

**Fig. S6.** The AIMD simulations for VS<sub>2</sub>/Ti<sub>3</sub>C<sub>2</sub>O<sub>2</sub> heterostructures with Li-loading at 300K.

**Fig. S7.** The AIMD simulations for VS<sub>2</sub>/V<sub>3</sub>C<sub>2</sub>O<sub>2</sub> heterostructures with Li-loading at 300K.

**Fig. S8.** The AIMD simulations for Variation of interlayer spacing Vs time steps (fs) of VS<sub>2</sub>/Ti<sub>3</sub>C<sub>2</sub>O<sub>2</sub> heterostructures with Li-loading.

**Fig. S9.** The AIMD simulations for Variation of interlayer spacing Vs time steps (fs) of VS<sub>2</sub>/V<sub>3</sub>C<sub>2</sub>O<sub>2</sub> heterostructures with Li-loading.

**Table S1** Calculated lattice parameters (a=b), thicknesses, M–C bond lengths ( $d_{M-C}$ , M = Ti or V), M–O bond lengths ( $d_{M-O}$ , M = Ti or V), V–S bond lengths ( $d_{V-S}$ ) and O–S bond lengths ( $d_{O-S}$ ) in the monolayer and VS<sub>2</sub>/M<sub>3</sub>C<sub>2</sub>O<sub>2</sub> hetrostructures. All distances are in Å units.

**Table S2** The interlayer distances ( $E_{\text{int}}$  in Å) for Li ions adsorbed between  $\text{VS}_2/\text{M}_3\text{C}_2\text{O}_2$  heterostructures.

**Table S3** The adsorption energy ( $E_{\text{ad}}$  in eV) for Li ions adsorbed between  $\text{VS}_2/\text{M}_3\text{C}_2\text{O}_2$  heterostructures.

**Table S4** The open circuit voltages (OCV in V) for Li ions in  $\text{VS}_2/\text{M}_3\text{C}_2\text{O}_2$  heterostructures.

**Table S5** The storage capacities ( $q$  in  $\text{mAhg}^{-1}$ ) of  $\text{VS}_2/\text{M}_3\text{C}_2\text{O}_2$  heterostructures.

**Table S6** Comparison of the Performance of Current Work with Previously Reported 2D Material-Based Li-Ion Batteries.

**Table S7** The average bond distances (in Å) for Li ions adsorbed between  $\text{VS}_2/\text{M}_3\text{C}_2\text{O}_2$  heterostructures.

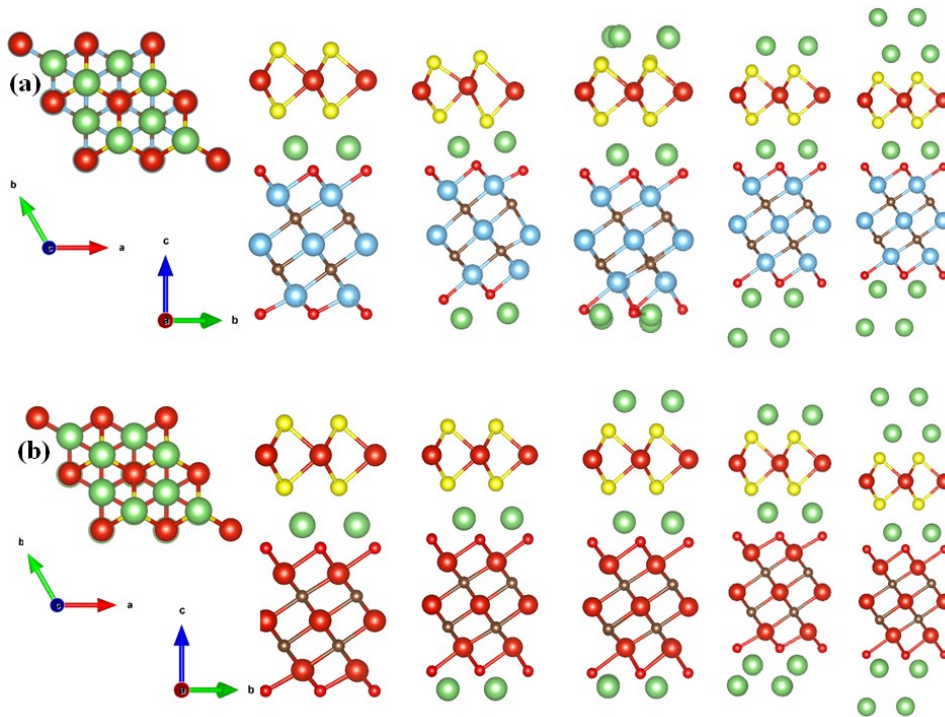

**Fig. S1.** Optimized structures of the (a)  $\text{VS}_2/\text{Ti}_3\text{C}_2\text{O}_2$  and (b)  $\text{VS}_2/\text{V}_3\text{C}_2\text{O}_2$  heterostructures were obtained through concentration variations with Li-loading.

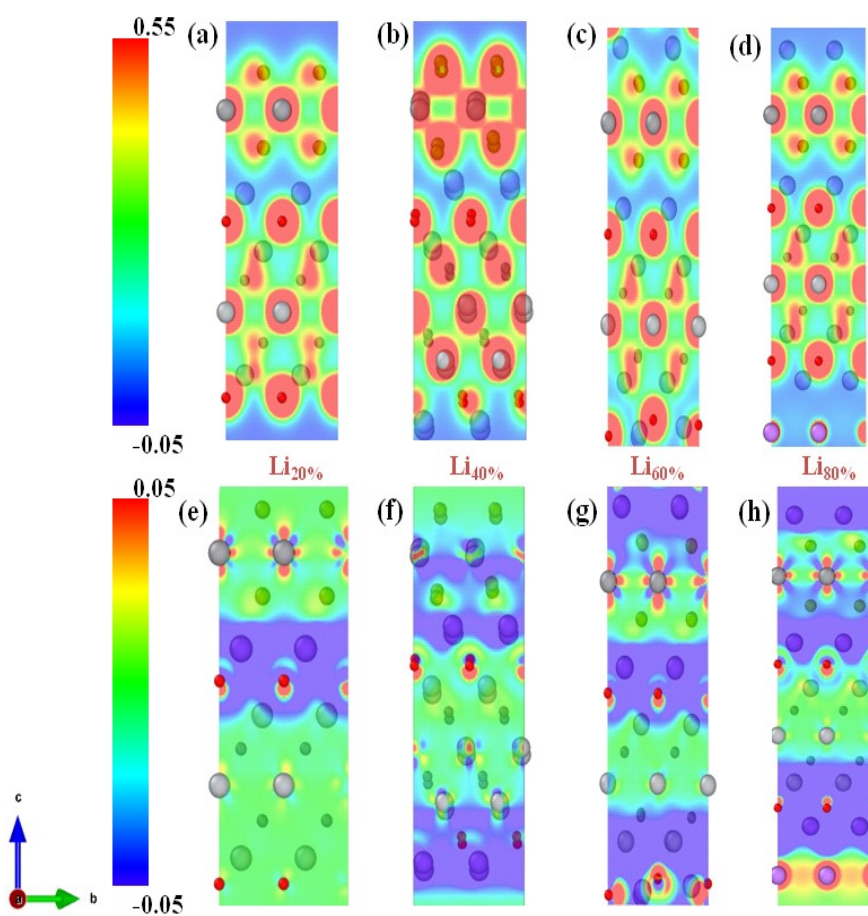

**Fig. S2.** The charge density (a - d) and charge density difference (e - h) plots for  $\text{VS}_2/\text{Ti}_3\text{C}_2\text{O}_2$  heterostructures with Li-loading. The symbols "+" and "-" indicates electron accumulation and depletion regions respectively.

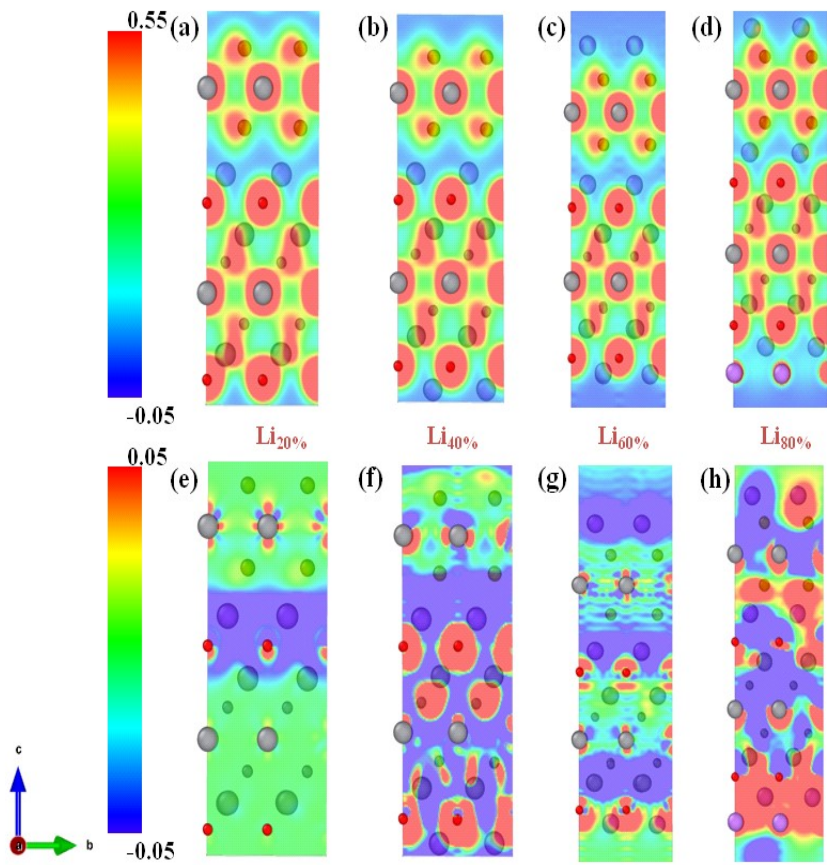

**Fig. S3.** The charge density (a - d) and charge density difference (e - h) plots for  $VS_2/V_3C_2O_2$  heterostructures with Li-loading. The symbols “+” and “-” indicates electron accumulation and depletion regions respectively.

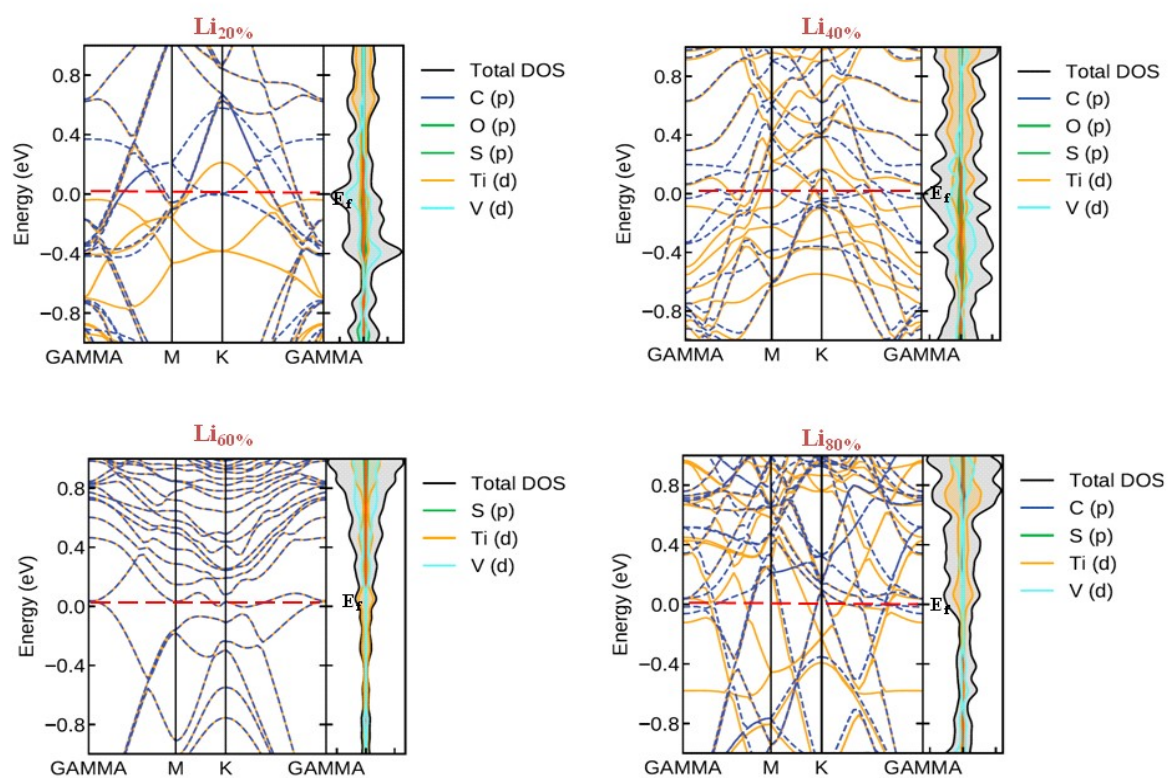

**Fig. S4.** The projected band structures with corresponding total density of states for VS<sub>2</sub>/Ti<sub>3</sub>C<sub>2</sub>O<sub>2</sub> heterostructures with Li-loading.

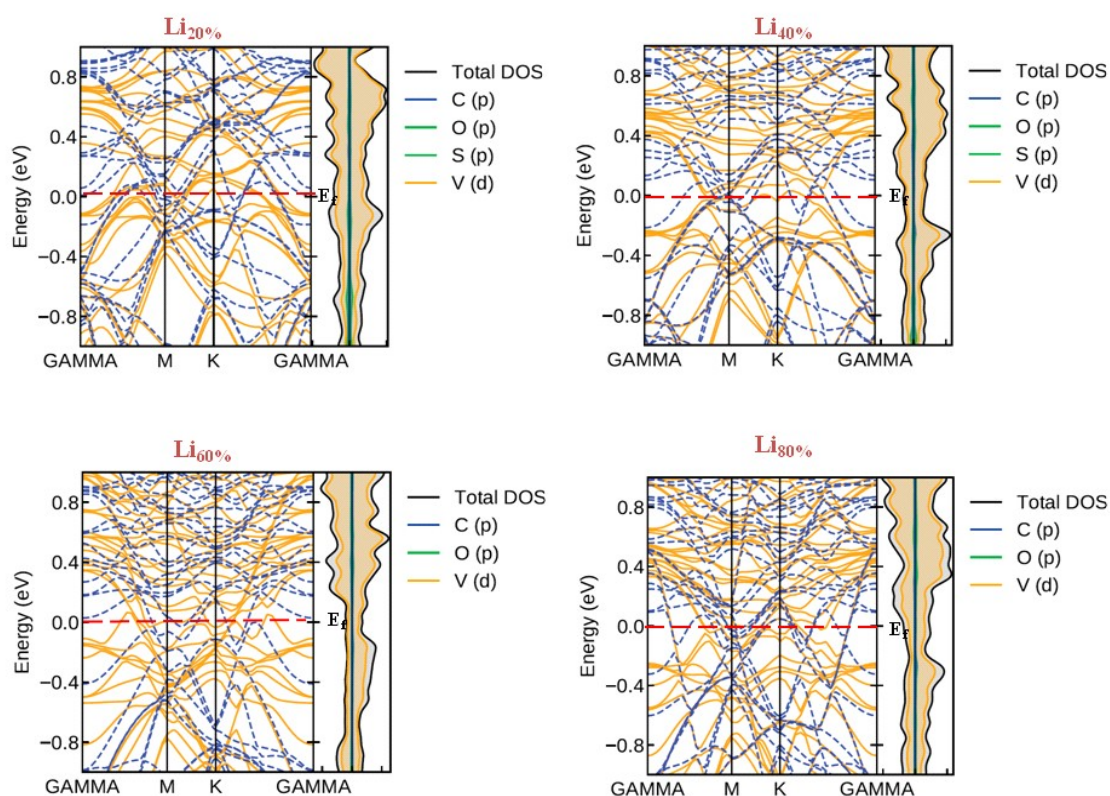

**Fig. S5.** The projected band structures with corresponding total density of states for  $\text{VS}_2/\text{V}_3\text{C}_2\text{O}_2$  heterostructures with Li-loading.

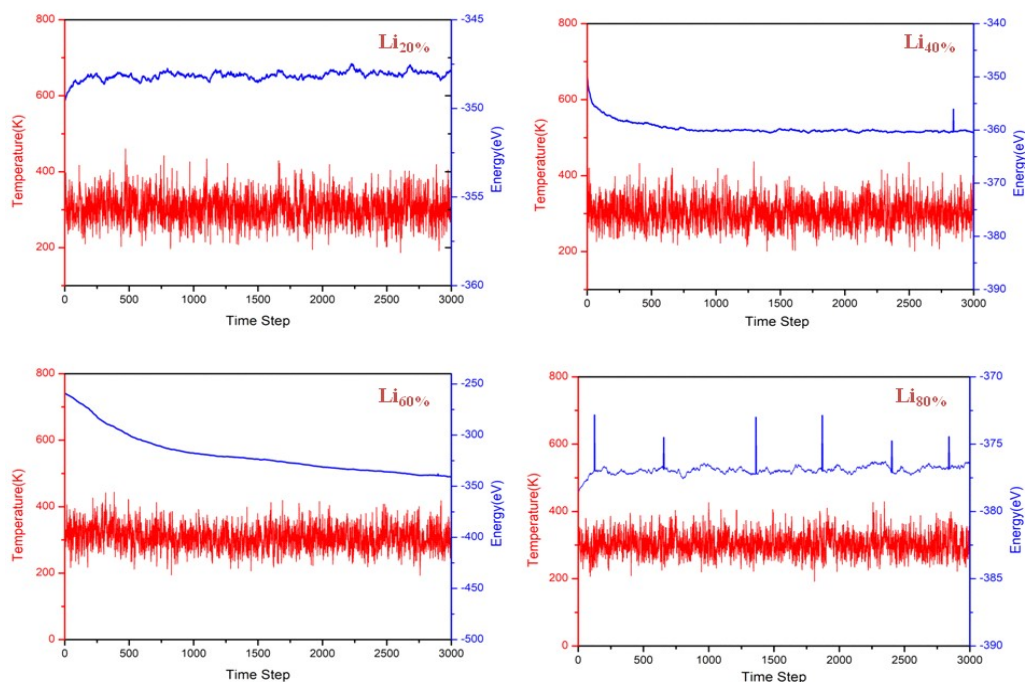

**Fig. S6.** The AIMD simulations for  $\text{VS}_2/\text{Ti}_3\text{C}_2\text{O}_2$  heterostructures with Li-loading at 300K.

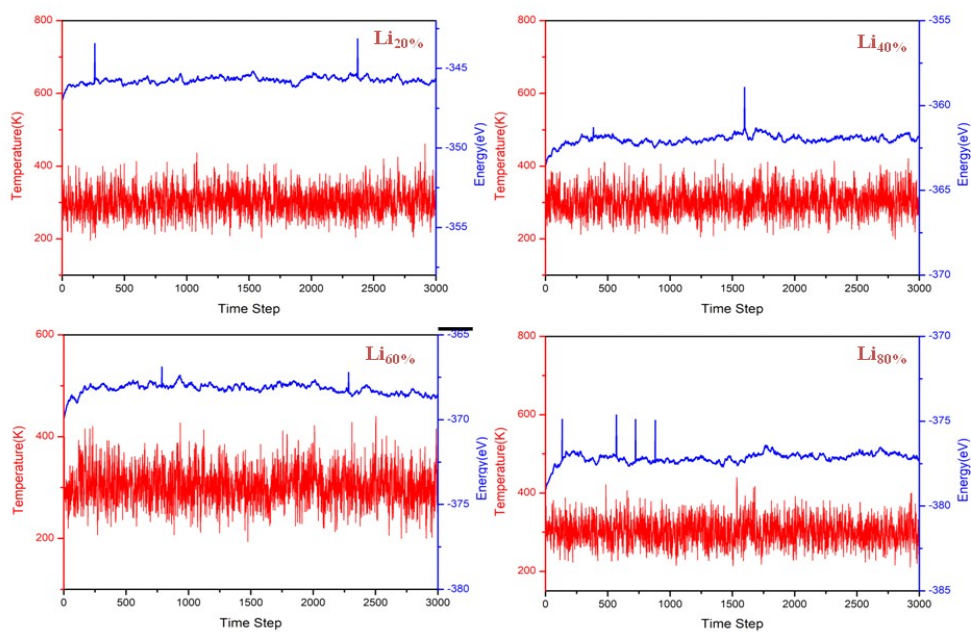

**Fig. S7.** The AIMD simulations for  $VS_2/V_3C_2O_2$  heterostructures with Li-loading at 300K.

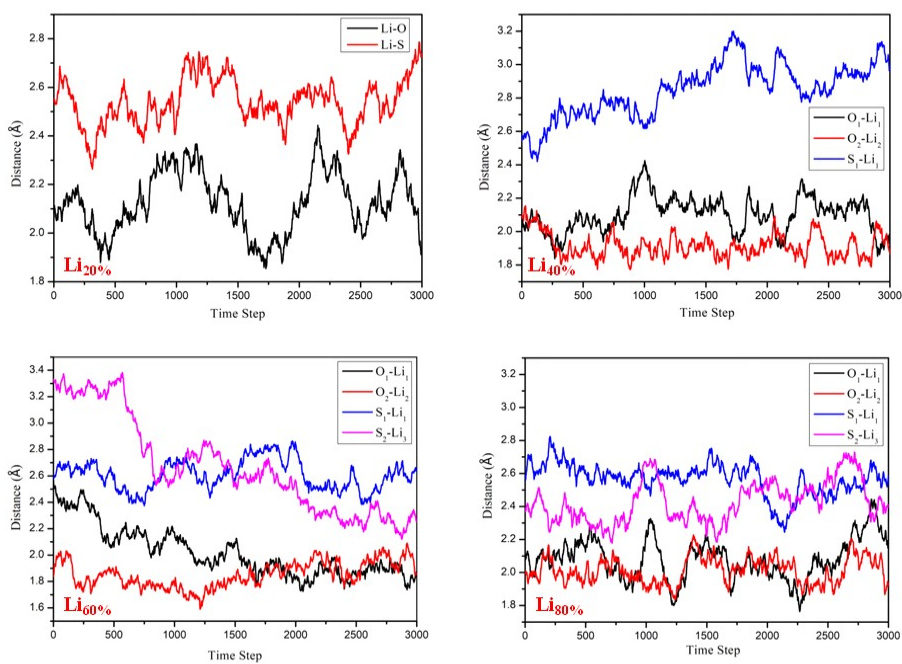

**Fig. S8.** The AIMD simulations for Variation of interlayer spacing Vs time steps (fs) of  $VS_2/Ti_3C_2O_2$  heterostructures with Li-loading.

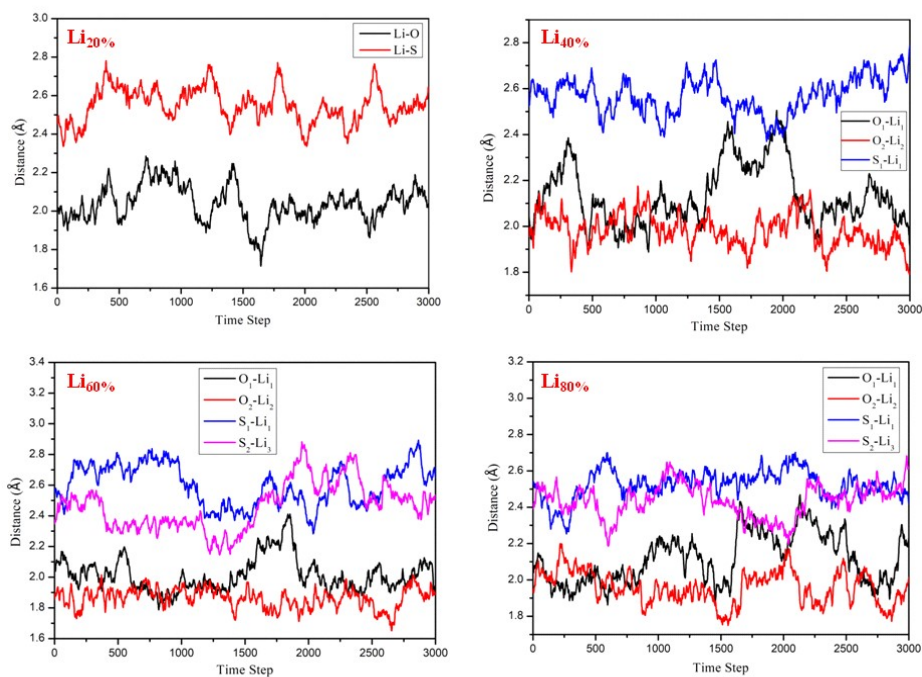

**Fig. S9.** The AIMD simulations for Variation of interlayer spacing Vs time steps (in fs) of  $VS_2/V_3C_2O_2$  heterostructures with Li-loading.

**Table S1** Calculated lattice parameters ( $a=b$ ), thicknesses, M–C bond lengths ( $d_{M-C}$ , M = Ti or V), M–O bond lengths ( $d_{M-O}$ , M = Ti or V), V–S bond lengths ( $d_{V-S}$ ) and O–S bond lengths ( $d_{O-S}$ ) in the monolayer and  $VS_2/M_3C_2O_2$  heterostructures. All distances are in Å units.

| Materials         | $a=b$ | Thickness | $d_{M-C}$ | $d_{M-O}$ | $d_{V-S}$ | $d_{O-S}$ |
|-------------------|-------|-----------|-----------|-----------|-----------|-----------|
| $Ti_3C_2O_2$      | 5.89  | 6.96      | 2.18      | 1.97      | ---       | ---       |
| $V_3C_2O_2$       | 5.80  | 6.81      | 2.06      | 1.95      | ---       | ---       |
| $VS_2$            | 6.33  | 2.99      | ---       | ---       | 2.36      | ---       |
| $VS_2/Ti_3C_2O_2$ | 6.11  | 12.86     | 2.19      | 1.98      | 2.33      | 3.32      |
| $VS_2/V_3C_2O_2$  | 5.92  | 12.73     | 2.07      | 1.98      | 2.31      | 3.29      |



**Table S2** The interlayer distances ( $E_{\text{int}}$  in Å) for Li ions adsorbed between  $\text{VS}_2/\text{M}_3\text{C}_2\text{O}_2$  heterostructures.

| $\text{VS}_2/\text{Ti}_3\text{C}_2\text{O}_2$ | $d_{\text{O1-S1}}$ | $d_{\text{O1-Li1}}$ | $d_{\text{Li1-S1}}$ | $d_{\text{C1-Li1}}$ | $d_{\text{C2-Li2}}$ | $d_{\text{C1-Li3}}$ | $d_{\text{O2-Li4}}$ | $d_{\text{S2-Li5}}$ |
|-----------------------------------------------|--------------------|---------------------|---------------------|---------------------|---------------------|---------------------|---------------------|---------------------|
| Pure                                          | 3.32               | ---                 | ---                 | ---                 | ---                 | ---                 | ---                 | ---                 |
| Li <sub>20%</sub>                             | 3.45               | 2.09                | 2.54                | 3.50                | ---                 | ---                 | ---                 | ---                 |
| Li <sub>40%</sub>                             | 3.45               | 2.09                | 2.54                | 3.50                | 3.52                | ---                 | ---                 | ---                 |
| Li <sub>60%</sub>                             | 3.45               | 2.05                | 2.63                | 3.37                | 2.72                | 9.81                | ---                 | ---                 |
| Li <sub>80%</sub>                             | 3.45               | 2.07                | 2.58                | 3.44                | 3.34                | 9.92                | 4.59                | ---                 |
| Li <sub>100%</sub>                            | 3.45               | 2.09                | 2.55                | 3.47                | 3.34                | 9.92                | 4.64                | 4.06                |
| $\text{VS}_2/\text{V}_3\text{C}_2\text{O}_2$  |                    |                     |                     |                     |                     |                     |                     |                     |
| Pure                                          | 3.29               | ---                 | ---                 | ---                 | ---                 | ---                 | ---                 | ---                 |
| Li <sub>20%</sub>                             | 3.34               | 2.03                | 2.47                | 3.37                | ---                 | ---                 | ---                 | ---                 |
| Li <sub>40%</sub>                             | 3.42               | 2.05                | 2.52                | 3.42                | 3.30                | ---                 | ---                 | ---                 |
| Li <sub>60%</sub>                             | 3.45               | 2.04                | 2.57                | 3.41                | 3.14                | 9.95                | ---                 | ---                 |
| Li <sub>80%</sub>                             | 3.45               | 2.03                | 2.53                | 3.49                | 3.19                | 10.00               | 4.55                | ---                 |
| Li <sub>100%</sub>                            | 3.45               | 2.04                | 2.54                | 3.43                | 3.25                | 10.00               | 4.58                | 4.07                |

**Table S3** The adsorption energy ( $E_{\text{ad}}$  in eV) for Li ions adsorbed between  $\text{VS}_2/\text{M}_3\text{C}_2\text{O}_2$  heterostructures.

| Li content         | $\text{VS}_2/\text{Ti}_3\text{C}_2\text{O}_2$ | $\text{VS}_2/\text{V}_3\text{C}_2\text{O}_2$ |
|--------------------|-----------------------------------------------|----------------------------------------------|
| Li <sub>20%</sub>  | -2.86                                         | -2.65                                        |
| Li <sub>40%</sub>  | -2.76                                         | -2.49                                        |
| Li <sub>60%</sub>  | -1.55                                         | -1.58                                        |
| Li <sub>80%</sub>  | -1.13                                         | -1.29                                        |
| Li <sub>100%</sub> | -1.01                                         | -0.96                                        |

**Table S4** The open circuit voltages (OCV in V) for Li ions in  $\text{VS}_2/\text{M}_3\text{C}_2\text{O}_2$  heterostructures.

| Li content         | $\text{VS}_2/\text{Ti}_3\text{C}_2\text{O}_2$ | $\text{VS}_2/\text{V}_3\text{C}_2\text{O}_2$ |
|--------------------|-----------------------------------------------|----------------------------------------------|
| Li <sub>20%</sub>  | 3.14                                          | 2.60                                         |
| Li <sub>40%</sub>  | 2.18                                          | 1.67                                         |
| Li <sub>60%</sub>  | 1.27                                          | 0.75                                         |
| Li <sub>80%</sub>  | 1.23                                          | 0.74                                         |
| Li <sub>100%</sub> | 1.30                                          | 0.73                                         |

**Table S5** The storage capacities ( $q$  in  $\text{mAhg}^{-1}$ ) of  $\text{VS}_2/\text{M}_3\text{C}_2\text{O}_2$  heterostructures.

| Li content         | $\text{VS}_2/\text{Ti}_3\text{C}_2\text{O}_2$ | $\text{VS}_2/\text{V}_3\text{C}_2\text{O}_2$ |
|--------------------|-----------------------------------------------|----------------------------------------------|
| Li <sub>20%</sub>  | 85.17                                         | 82.64                                        |
| Li <sub>40%</sub>  | 170.34                                        | 165.28                                       |
| Li <sub>60%</sub>  | 255.50                                        | 247.91                                       |
| Li <sub>80%</sub>  | 340.67                                        | 330.55                                       |
| Li <sub>100%</sub> | 425.84                                        | 413.19                                       |

**Table S6** Comparison of the Performance of Current Work with Previously Reported 2D Material-Based Li-ion Batteries.

| Material Structure                                     | Reported Capacity ( $\text{mAhg}^{-1}$ ) | References         |
|--------------------------------------------------------|------------------------------------------|--------------------|
| $\text{Ti}_3\text{C}_2$                                | 447.8                                    | [Ref] <sup>1</sup> |
| $\text{V}_3\text{C}_2$                                 | 606.42                                   | [Ref] <sup>2</sup> |
| $\text{VS}_2$                                          | 195.4                                    | [Ref] <sup>3</sup> |
| $\text{V}_3\text{C}_2/\text{graphene}$                 | 598.63                                   | [Ref] <sup>4</sup> |
| $\text{V}_2\text{O}_5/\text{Ti}_3\text{C}_2\text{T}_x$ | 321                                      | [Ref] <sup>5</sup> |
| $\text{VS}_2/\text{Ti}_2\text{CO}_2$                   | 462.08                                   | [Ref] <sup>6</sup> |
| $\text{Ti}_2\text{CO}_2/\text{graphene}$               | 426                                      | [Ref] <sup>7</sup> |
| $\text{MoS}_2/\text{Ti}_3\text{C}_2\text{T}_x$         | 153                                      | [Ref] <sup>8</sup> |
| $\text{VS}_2/\text{Ti}_3\text{C}_2\text{O}_2$          | 425.84                                   | Current Work       |
| $\text{VS}_2/\text{V}_3\text{C}_2\text{O}_2$           | 413.19                                   | Current Work       |

**Table S7** The average bond distances (in Å) for Li ions adsorbed between  $\text{VS}_2/\text{M}_3\text{C}_2\text{O}_2$  heterostructures.

| Concentration      | $\text{VS}_2/\text{Ti}_3\text{C}_2\text{O}_2$ |                     |                     |                     | $\text{VS}_2/\text{V}_3\text{C}_2\text{O}_2$ |                     |                     |                     |
|--------------------|-----------------------------------------------|---------------------|---------------------|---------------------|----------------------------------------------|---------------------|---------------------|---------------------|
|                    | $d_{\text{O1-Li1}}$                           | $d_{\text{O2-Li2}}$ | $d_{\text{S1-Li1}}$ | $d_{\text{S2-Li3}}$ | $d_{\text{O1-Li1}}$                          | $d_{\text{O2-Li2}}$ | $d_{\text{S1-Li1}}$ | $d_{\text{S2-Li3}}$ |
| Li <sub>20%</sub>  | 2.12                                          | ---                 | 2.54                | ---                 | 2.04                                         | ---                 | 2.55                | ---                 |
| Li <sub>40%</sub>  | 2.10                                          | 1.92                | 2.85                | ---                 | 2.13                                         | 1.98                | 2.57                | ---                 |
| Li <sub>60%</sub>  | 2.02                                          | 1.85                | 2.61                | 2.67                | 2.01                                         | 1.86                | 2.60                | 2.46                |
| Li <sub>80%</sub>  | 2.08                                          | 2.01                | 2.57                | 2.43                | 2.11                                         | 1.96                | 2.53                | 2.44                |
| Li <sub>100%</sub> | 2.15                                          | 2.00                | 2.65                | 2.37                | 2.05                                         | 2.02                | 2.64                | 2.47                |

## References

- 1 D. Er, J. Li, M. Naguib, Y. Gogotsi en V. B. Shenoy, *ACS Appl. Mater. Interfaces*, 2014, 6, 11173–11179.
- 2 K. Fan, Y. Ying, X. Li, X. Luo en H. Huang, *J. Phys. Chem. C*, 2019, 123, 18207–18214.
- 3 J. Z. Liu en P. F. Guo, *Wuji Cailiao Xuebao/Journal Inorg. Mater.*, 2015, 30, 1339–1344.

- 4 P. P. Dinda en S. Meena, *J. Phys: Condens. Matter.*, 2021, 33, 175001 .
- 5 Y. Wang, T. Lubbers, R. Xia, Y.-Z. Zhang, M. Mehrali, M. Huijben en J. E. ten Elshof, *J. Electrochem. Soc.*, 2021, 168, 020507.
- 6 D. X. Song, L. Xie, Y. F. Zhang, Y. Lu, M. An, W. G. Ma en X. Zhang, *ACS Appl. Energy Mater.*, 2020, 3, 7699–7709.
- 7 Y. T. Du, X. Kan, F. Yang, L. Y. Gan en U. Schwingenschlögl, *ACS Appl. Mater. Interfaces*, 2018, 10, 32867–32873.
- 8 D. Wang, Y. Gao, Y. Liu, Y. Gogotsi, X. Meng, G. Chen en Y. Wei, *J. Mater. Chem. A*, 2017, 5, 24720–24727.
